# Supplementary material
Source: ML conference proceedings conference paper supplement (https://openaccess.thecvf.com/content/CVPR2024/html/Ho_Model_Inversion_Robustness_CVPR_2024_paper.html)
Supplement: Supplementary file 1 [file Ho_Model_Inversion_Robustness_CVPR_2024_supplemental.pdf]

# Model Inversion Robustness: Can Transfer Learning Help?

## Supplementary

Sy-Tuyen Ho<sup>1</sup>   Koh Jun Hao<sup>1</sup>  
 Keshigeyan Chandrasegaran<sup>2†</sup>   Ngoc-Bao Nguyen<sup>1</sup>   Ngai-Man Cheung<sup>1</sup>  
<sup>1</sup>Singapore University of Technology and Design (SUTD)   <sup>2</sup>Stanford University  
 hosy\_tuyen@sutd.edu.sg   ngaiman\_cheung@sutd.edu.sg

### Overview

In this Supp., we provide additional experimental results, additional analysis, limitation of existing MI defenses, detailed experiment setting, detailed reproducibility, and qualitative results. These are not included in the main paper due to the space limitation. The PyTorch code, a demonstration, inverted data, and pre-trained models are available at our project page: [https://hosy\\_tuyen.github.io/projects/TL-DMI](https://hosy_tuyen.github.io/projects/TL-DMI)

### Contents

|                                                     |          |
|-----------------------------------------------------|----------|
| <b>A Additional Results</b>                         | <b>1</b> |
| A.1 Additional result on BREPMI                     | 1        |
| A.2 Additional Empirical Validation on GMI          | 1        |
| A.3 Additional result on LOMMA                      | 2        |
| A.4 Additional result on Stanford Cars dataset      | 2        |
| A.5 Additional results on other MI setups           | 2        |
| A.6 Comparison with SOTA MI Defense                 | 2        |
| <b>B Additional Analysis</b>                        | <b>2</b> |
| B.1 The effect of pretrain dataset to MI robustness | 2        |
| B.2 Layer-wise MI Vulnerability Analysis            | 3        |
| B.3 Additional Analysis of Layer Importance         | 3        |
| B.4 MI Robustness via the False Positive Concept    | 4        |
| <b>C The limitation of Existing MI Defenses</b>     | <b>6</b> |
| <b>D Experiment Setting</b>                         | <b>6</b> |
| D.1 Detailed MI Setup                               | 6        |
| D.2 Evaluation metrics                              | 8        |
| <b>E Reproducibility</b>                            | <b>9</b> |
| E.1 The details for training $T$                    | 9        |
| E.2 Compute resource                                | 10       |
| E.3 Error Bars                                      | 10       |

† Work done while at SUTD.

|                               |           |
|-------------------------------|-----------|
| <b>F. Qualitative results</b> | <b>11</b> |
| F.1. Visual Comparison        | 11        |
| F.2. User study               | 11        |

### A. Additional Results

#### A.1. Additional result on BREPMI

| Defense | Acc $\uparrow$ | AttAcc $\downarrow$ | $\Delta$ $\uparrow$ | KNN $\uparrow$ |
|---------|----------------|---------------------|---------------------|----------------|
| No Def. | 89.00          | 69.67               | -                   | 1337.01        |
| BiDO    | 80.35          | 39.73               | 3.46                | 1534.48        |
| TL-DMI  | 83.41          | 42.00               | <b>4.90</b>         | 1517.38        |

Table 1. Empirical results for BREPMI [10]. Following the exact experimental setups from BREPMI,  $\mathcal{D}_{priv} = \text{CelebA}$ ,  $\mathcal{D}_{pub} = \text{CelebA}$ , evaluation model = FaceNet, and target classifier  $T = \text{VGG16}$ , there are a total of 300 attacked classes. Our proposed TL-DMI achieves better MI robustness, which is quantified by **MI robustness is quantified by the  $\Delta$ , the ratio of drop in attack accuracy to drop in natural accuracy**

#### A.2. Additional Empirical Validation on GMI

Beside the empirical validation on VGG16 with KEDMI and ResNet-18 with PPA presented in the main manuscript. We also provide additional empirical validation on VGG16 with GMI in Fig. 1. The observation is consistent with the results in the main manuscript.

| Defense | Acc $\uparrow$ | AttAcc $\downarrow$ | $\Delta$ $\uparrow$ |
|---------|----------------|---------------------|---------------------|
| No Def. | 90.55          | 83.87               | -                   |
| TL-DMI  | 85.60          | 19.25               | <b>13.05</b>        |

Table 2. We follow the MI setup from MIRROR, where  $T = \text{ResNet-34}$ ,  $\mathcal{D}_{priv} = \text{Stanford Cars}$ ,  $\mathcal{D}_{pub} = \text{LSUN Cars}$ ,  $\mathcal{D}_{pretrain} = \text{ImageNet1K}$ .

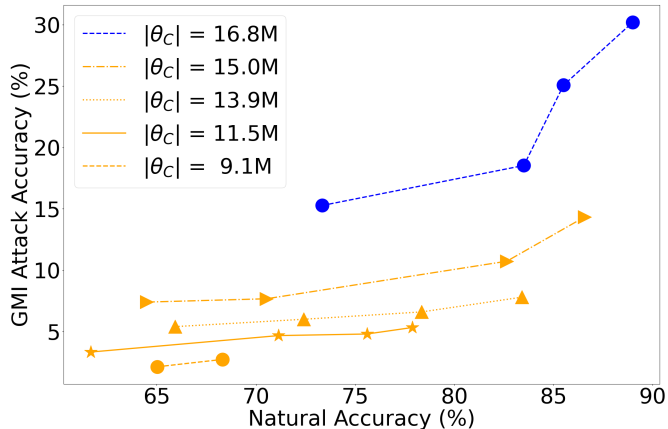

Figure 1. Empirical Validation on VGG16 with GMI. Each line represents one training setup for  $T$  with a different  $|\theta_C|$  updated on  $\mathcal{D}_{priv}$ . Note that number of parameters for the entire target model  $|\theta_T| = 16.8M$  for this MI setup. To separate the influence of natural accuracy on MI attack accuracy, we perform GMI attacks on different checkpoints for each training setup, varying a wide range of natural accuracy. This is presented by multiple data points on each line. For a given natural accuracy, it can be clearly observed that attack accuracy can be reduced by decreasing  $|\theta_C|$ , i.e., decreasing parameters updated on  $\mathcal{D}_{priv}$ .

### A.3. Additional result on LOMMA

Due to the remarkably simple implementation of our proposed TL-DMI, we expand the MI robustness evaluation to LOMMA [14], is the SOTA MI attacks. Note that this MI attack has not been included yet in SOTA MI defense BiDO. The results in Tab. 6 shown that TL-DMI is able to defense against SOTA MI attack LOMMA. For a fair comparison, we strictly follow LOMMA for the MI setups.

### A.4. Additional result on Stanford Cars dataset

We further show the effectiveness of our proposed TL-DMI on Dogs breeds classification (see Tab. 4) and additional Cars Classification in Tab. 2. The results further show the effectiveness of TL-DMI.

### A.5. Additional results on other MI setups

We further provide 3 more setups with PPA in Tab. 4 in this rebuttal. All results consistently support outstanding defense trade-off with TL-DMI

### A.6. Comparison with SOTA MI Defense

We provide a comprehensive comparisons between our proposed TL-DMI and BiDO and MID under **6 attacks**: VMI, LOMMA, PPA, KEDMI, GMI, and BREPMI. To avoid the effect of randomness in our comparison, we calculate  $\Delta$  under 3 attacks of different random seeds. We summarize the comparison in Tab. 5. **All results consistently support that**

| Attack | Defense     | Acc $\uparrow$ | AttAcc $\downarrow$ | $\Delta$ $\uparrow$                |
|--------|-------------|----------------|---------------------|------------------------------------|
| PPA    | No Def.     | 94.86          | 82.83 $\pm$ 0.17    | -                                  |
|        | MID (0.05)  | 90.85          | 52.09 $\pm$ 0.45    | 7.67 $\pm$ 0.09                    |
|        | MID (0.02)  | 91.54          | 61.67 $\pm$ 0.33    | 5.77 $\pm$ 0.06                    |
|        | MID (0.01)  | 92.70          | 75.84 $\pm$ 0.60    | 2.11 $\pm$ 0.15                    |
|        | TL-DMI      | 90.10          | 31.70 $\pm$ 0.17    | <b>10.74 <math>\pm</math> 0.05</b> |
| LOMMA  | No Def.     | 89.00          | 93.68 $\pm$ 1.94    | -                                  |
|        | MID (0.002) | 78.06          | 76.51 $\pm$ 0.27    | 1.57 $\pm$ 0.20                    |
|        | MID (0.003) | 75.83          | 78.73 $\pm$ 1.88    | 0.28 $\pm$ 0.29                    |
|        | MID (0.004) | 72.87          | 76.14 $\pm$ 0.90    | 1.09 $\pm$ 0.10                    |
|        | TL-DMI      | 83.41          | 72.47 $\pm$ 2.85    | <b>3.79 <math>\pm</math> 0.19</b>  |

Table 3. Varying MID hyperparameters, we conduct three comparisons, reporting mean and standard deviation.

| Attack    | T          | Defense | Acc $\uparrow$ | AttAcc $\downarrow$ | $\Delta$ $\uparrow$                |
|-----------|------------|---------|----------------|---------------------|------------------------------------|
| ResNet-18 |            | No Def. | 94.22          | 47.41 $\pm$ 0.18    | -                                  |
|           |            | TL-DMI  | 91.12          | 5.19 $\pm$ 0.23     | <b>13.62 <math>\pm</math> 0.04</b> |
| PPA       | ResNet-101 | No Def. | 96.57          | 38.99 $\pm$ 0.19    | -                                  |
|           |            | TL-DMI  | 93.01          | 6.66 $\pm$ 0.12     | <b>9.08 <math>\pm</math> 0.03</b>  |
| MaxViT    |            | No Def. | 96.57          | 31.79 $\pm$ 0.20    | -                                  |
|           |            | TL-DMI  | 93.01          | 4.11 $\pm$ 0.16     | <b>7.78 <math>\pm</math> 0.03</b>  |

Table 4. Additional MI setups for PPA, where  $\mathcal{D}_{priv}$  = FaceScrub,  $\mathcal{D}_{pub}$  = Metfaces,  $\mathcal{D}_{pretrain}$  = ImageNet1K.

## TL-DMI outperforms BiDO and MID

For BiDO reproducibility, we follow the exact hyperparameters from their work. Note that BiDO is the best defense by far, but it requires extensive grid-search for hyperparameters. For MID reproducibility, we adopt their implementation and hyperparameters. Furthermore, we provide the results for MID with different hyperparameter choices in Tab. 3.

## B. Additional Analysis

### B.1. The effect of pretrain dataset to MI robustness

In these above sections, we use a consistent and standard pre-trained dataset to ensure fair comparison with other methods in the literature. Since the pre-trained backbone can be produced with different datasets in practice, we investigate the impact of different pre-trained datasets on MI robustness in this section. Specifically, we implement the same setup as the KEDMI setup for VGG16, but vary three different pre-trained datasets: ImageNet1K, Facescrub, and Pubfig83. The results are shown in Fig. 2.

Updating all parameters  $|\theta_C| = 16.8M$  on  $\mathcal{D}_{priv}$ , yields no significant differences among different  $\mathcal{D}_{pretrain}$ . This is expected and align with our understanding, where all the parameters in  $T$  are exposed to private data during the training of  $T$ . With fewer trainable parameters on  $\mathcal{D}_{priv}$ , we notice clearer differences. Overall, pre-training on a closer domain (Pubfig83 and Facescrub) restores natural accuracy much better than pre-training on a general domain (Ima-

| Attack  | T          | Defense | Acc $\uparrow$ | AttAcc $\downarrow$ | $\Delta$ $\uparrow$                |
|---------|------------|---------|----------------|---------------------|------------------------------------|
| LOMMA   | VGG-16     | No Def. | 89.00          | 93.68 $\pm$ 1.94    | -                                  |
|         |            | MID     | 78.06          | 76.51 $\pm$ 0.27    | 1.57 $\pm$ 0.20                    |
|         |            | BiDO    | 80.35          | 66.22 $\pm$ 3.74    | 3.17 $\pm$ 0.29                    |
|         |            | TL-DMI  | 83.41          | 72.47 $\pm$ 2.85    | <b>3.79 <math>\pm</math> 0.19</b>  |
| PPA     | ResNet-18  | No Def. | 94.22          | 90.08 $\pm$ 1.40    | -                                  |
|         |            | MID     | 88.27          | 48.81 $\pm$ 0.28    | 6.94 $\pm$ 0.22                    |
|         |            | BiDO    | 91.33          | 76.65 $\pm$ 0.09    | 4.65 $\pm$ 0.46                    |
|         |            | TL-DMI  | 91.12          | 21.32 $\pm$ 0.90    | <b>22.18 <math>\pm</math> 0.74</b> |
| PPA     | ResNet-101 | No Def. | 94.86          | 82.83 $\pm$ 0.17    | -                                  |
|         |            | MID     | 90.85          | 52.09 $\pm$ 0.45    | 7.67 $\pm$ 0.09                    |
|         |            | BiDO    | 90.32          | 67.43 $\pm$ 0.36    | 3.39 $\pm$ 0.09                    |
|         |            | TL-DMI  | 90.10          | 31.70 $\pm$ 0.17    | <b>10.74 <math>\pm</math> 0.05</b> |
| KEDMI   | VGG-16     | No Def. | 89.00          | 87.71 $\pm$ 2.73    | -                                  |
|         |            | MID     | 78.06          | 66.64 $\pm$ 0.78    | 1.93 $\pm$ 0.30                    |
|         |            | BiDO    | 80.35          | 39.77 $\pm$ 5.60    | 5.54 $\pm$ 0.33                    |
|         |            | TL-DMI  | 83.41          | 51.64 $\pm$ 1.97    | <b>6.45 <math>\pm</math> 0.59</b>  |
| BREP-MI | VGG-16     | No Def. | 89.00          | 70.56 $\pm$ 1.84    | -                                  |
|         |            | MID     | 78.06          | 16.47 $\pm$ 1.07    | 4.91 $\pm$ 0.26                    |
|         |            | BiDO    | 80.35          | 39.35 $\pm$ 0.90    | 3.61 $\pm$ 0.16                    |
|         |            | TL-DMI  | 83.41          | 41.22 $\pm$ 0.69    | <b>5.24 <math>\pm</math> 0.41</b>  |
| VMI     | ResNet-34  | No Def. | 69.27          | 39.40               | -                                  |
|         |            | MID     | 52.52          | 29.05               | 0.62                               |
|         |            | BiDO    | 61.14          | 30.25               | 1.13                               |
|         |            | TL-DMI  | 62.20          | 21.73 $\pm$ 2.08    | <b>2.5 <math>\pm</math> 0.30</b>   |
| GMI     | VGG-16     | No Def. | 89.00          | 31.25 $\pm$ 1.04    | -                                  |
|         |            | MID     | 78.06          | 28.78 $\pm$ 1.24    | 0.25 $\pm$ 0.16                    |
|         |            | BiDO    | 80.35          | 6.31 $\pm$ 0.54     | 2.88 $\pm$ 0.15                    |
|         |            | TL-DMI  | 83.41          | 8.47 $\pm$ 0.58     | <b>4.08 <math>\pm</math> 0.11</b>  |

Table 5. We re-run three comparisons, presenting mean and standard deviation. Following VMI setup from BiDO, we encounter code reproducibility issues, and we take the best result reported in BiDO paper.

genet1K).

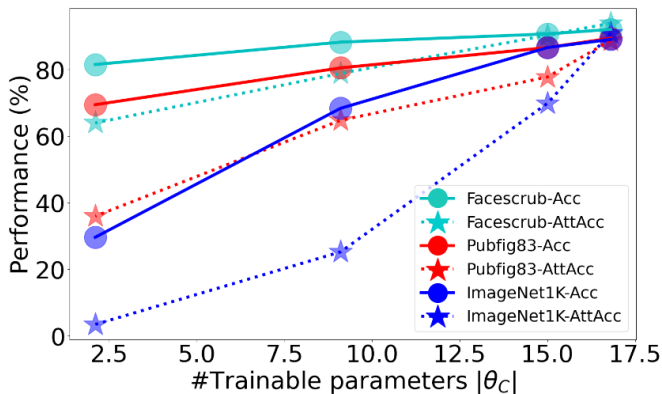

|            | #Images | Domain         | #Classes |
|------------|---------|----------------|----------|
| ImageNet1K | 1.3M    | General Domain | 1000     |
| Pubfig83   | 13K     | Facial Domain  | 83       |
| Facescrub  | 106K    | Facial Domain  | 530      |

Figure 2. The effect of different  $\mathcal{D}_{pretrain}$ , i.e., ImageNet1K, Pubfig83, and Facescrub. We use  $T = \text{VGG16}$ ,  $\mathcal{D}_{priv} = \text{CelebA}$ . The results suggest that the less similarity between pretrain and private dataset domains can improve defense effectiveness.

For instance, with  $|\theta_C| = 2.1\text{M}$ , pre-training on Facescrub and Pubfig83 achieve 81.48% and 69.41% accuracy,

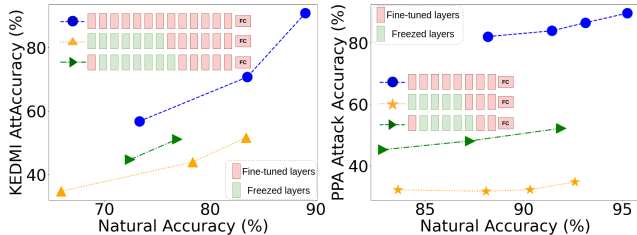

Figure 3. We follow KEDMI-VGG16 and PPA-ResNet-18 setups in Fig. 1-II. Fine-tuning first layers (green line), rather than middle layers (orange line), enhances MI attack accuracy, corroborating our analysis: first layers are important for MI.

respectively, compared to 29.59% in the Imagenet1K setup. Nevertheless, pre-training on a closer domain also increases the risk of MI attack. As those frozen parameters during the fine-tuning on  $\mathcal{D}_{priv}$  keep the feature representations from  $\mathcal{D}_{pretrain}$ , thus, the closer the  $\mathcal{D}_{pretrain}$ , the riskier it is for the model against MI attack. Notably, with  $|\theta_C| = 15.0\text{M}$ , models pre-training on ImageNet1K and Pubfig83 achieve comparable accuracy. However, using ImageNet1K as  $\mathcal{D}_{pretrain}$  renders a more robust model (decreasing MI attack accuracy by 8.06%) than the setup of Pubfig83. In conclusion, when using our TL-DMI to train a MI robust model, it is critical to choose the  $\mathcal{D}_{pretrain}$  for a trade-off between restoring model utility and robustness. Specifically, **less similarity between pretrain and private dataset domains can improve defense effectiveness.**

## B.2. Layer-wise MI Vulnerability Analysis

we conduct the following experiments which strongly corroborate our analytical results. Specifically, instead of fine-tuning the middle layers, we fine-tune the first layers, see Fig. 3 in this rebuttal. This single change significantly degrades the defense performance and helps MI attacks, which corroborate our analytical results: first layers are important for MI based on our Fisher Information analysis; therefore, fine-tuning the first layers with private dataset helps MI attacks significantly. As another detail to further corroborate our analysis, we remark that first layers have less parameters than middle layers. Yet, MI attacks perform better with fine-tuning private dataset in first layers. This further supports first layers are important for MI. We remark that last layers are critical for classification task, consistent with TL literature. The natural accuracy is much degraded if fine-tuning of last layers is removed.

## B.3. Additional Analysis of Layer Importance

**FI across MI iterations.** MI is a multiple iteration process. The FI for MI in the main manuscript is computed at the last iteration (the iteration that we present the result throughout our submission). Fig. 5 also provides the FI across multiple

| Attack Method | $\mathcal{D}_{priv}$ | $\mathcal{D}_{pub}$ | $\mathcal{D}_{pretrain}$ | $T$   | Defense Method | $ \theta_C / \theta_T $ | Acc $\uparrow$ | Top1-AttAcc $\downarrow$           | Top5-AttAcc $\downarrow$           | KNN Dist $\uparrow$ |
|---------------|----------------------|---------------------|--------------------------|-------|----------------|-------------------------|----------------|------------------------------------|------------------------------------|---------------------|
| LOMMA-K       | CelebA               | CelebA              | ImageNet1K               | VGG16 | No Def.        | 16.8/16.8               | 89.00          | 95.67 $\pm$ 0.91                   | 96.68 $\pm$ 0.01                   | 1158                |
|               |                      |                     |                          |       | TL-DMI         | 13.9/16.8               | 83.41          | <b>75.67 <math>\pm</math> 1.83</b> | <b>91.68 <math>\pm</math> 0.01</b> | <b>1304</b>         |
|               |                      |                     | MS-CelebA-1M             | IR152 | No Def.        | 62.6/62.6               | 93.52          | 96.40 $\pm$ 0.51                   | 99.67 $\pm$ 0.15                   | 1038                |
|               |                      |                     |                          |       | TL-DMI         | 17.8/62.6               | 86.70          | <b>77.73 <math>\pm</math> 1.57</b> | <b>94.67 <math>\pm</math> 0.66</b> | <b>1305</b>         |
|               |                      |                     | FaceNet64                | VGG16 | No Def.        | 35.4/35.4               | 88.50          | 89.33 $\pm$ 1.19                   | 98.67 $\pm$ 0.15                   | 1226                |
|               |                      |                     |                          |       | TL-DMI         | 34.4/35.4               | 83.41          | <b>79.60 <math>\pm</math> 1.78</b> | <b>97.00 <math>\pm</math> 0.61</b> | <b>1345</b>         |
|               | CelebA               | FFHQ                | ImageNet1K               | VGG16 | No Def.        | 16.8/16.8               | 89.00          | 58.60 $\pm$ 1.67                   | 86.00 $\pm$ 1.14                   | 1390                |
|               |                      |                     |                          |       | TL-DMI         | 13.9/16.8               | 83.41          | <b>36.00 <math>\pm</math> 1.28</b> | <b>65.00 <math>\pm</math> 1.95</b> | <b>1550</b>         |
|               |                      |                     | MS-CelebA-1M             | IR152 | No Def.        | 62.6/62.6               | 93.52          | 73.47 $\pm$ 1.30                   | 90.00 $\pm$ 0.85                   | 1290                |
|               |                      |                     |                          |       | TL-DMI         | 17.8/62.6               | 86.70          | <b>45.27 <math>\pm</math> 1.98</b> | <b>74.33 <math>\pm</math> 1.25</b> | <b>1474</b>         |
|               |                      |                     | FaceNet64                | VGG16 | No Def.        | 35.4/35.4               | 88.50          | 70.27 $\pm$ 1.63                   | 90.33 $\pm$ 0.72                   | 1391                |
|               |                      |                     |                          |       | TL-DMI         | 34.4/35.4               | 83.41          | <b>19.53 <math>\pm</math> 1.19</b> | <b>41.33 <math>\pm</math> 1.34</b> | <b>1759</b>         |
| LOMMA-G       | CelebA               | CelebA              | ImageNet1K               | VGG16 | No Def.        | 16.8/16.8               | 89.00          | 56.00 $\pm$ 3.65                   | 79.00 $\pm$ 3.84                   | 1454                |
|               |                      |                     |                          |       | TL-DMI         | 13.9/16.8               | 83.41          | <b>22.00 <math>\pm</math> 4.77</b> | <b>45.33 <math>\pm</math> 9.08</b> | <b>1709</b>         |
|               |                      |                     | MS-CelebA-1M             | IR152 | No Def.        | 62.6/62.6               | 93.52          | 64.67 $\pm$ 5.54                   | 86.00 $\pm$ 5.09                   | 1401                |
|               |                      |                     |                          |       | TL-DMI         | 17.8/62.6               | 86.70          | <b>41.87 <math>\pm</math> 5.37</b> | <b>70.67 <math>\pm</math> 5.97</b> | <b>1551</b>         |
|               |                      |                     | FaceNet64                | VGG16 | No Def.        | 35.4/35.4               | 88.50          | 60.00 $\pm$ 5.90                   | 80.00 $\pm$ 3.81                   | 1501                |
|               |                      |                     |                          |       | TL-DMI         | 34.4/35.4               | 83.41          | <b>43.67 <math>\pm</math> 5.60</b> | <b>65.00 <math>\pm</math> 6.82</b> | <b>1616</b>         |
|               | CelebA               | FFHQ                | ImageNet1K               | VGG16 | No Def.        | 16.8/16.8               | 89.00          | 27.00 $\pm$ 6.10                   | 52.33 $\pm$ 5.82                   | 1642                |
|               |                      |                     |                          |       | TL-DMI         | 13.9/16.8               | 83.41          | <b>8.87 <math>\pm</math> 3.12</b>  | <b>24.00 <math>\pm</math> 5.50</b> | <b>1829</b>         |
|               |                      |                     | MS-CelebA-1M             | IR152 | No Def.        | 62.6/62.6               | 93.52          | 45.20 $\pm$ 4.30                   | 70.67 $\pm$ 4.58                   | 1503                |
|               |                      |                     |                          |       | TL-DMI         | 17.8/62.6               | 86.70          | <b>22.87 <math>\pm</math> 5.05</b> | <b>43.67 <math>\pm</math> 7.46</b> | <b>1650</b>         |
|               |                      |                     | FaceNet64                | VGG16 | No Def.        | 35.4/35.4               | 88.50          | 30.60 $\pm$ 5.21                   | 62.00 $\pm$ 5.69                   | 1625                |
|               |                      |                     |                          |       | TL-DMI         | 34.4/35.4               | 83.41          | <b>9.33 <math>\pm</math> 4.55</b>  | <b>24.33 <math>\pm</math> 4.55</b> | <b>1909</b>         |

Table 6. Our extended MI robustness evaluation on SOTA MI attack LOMMA [14]. The results of AttAcc and Acc are given in %. We reports the MI defense results against different LOMMA attack setups including LOMMA+KEDMI (LOMMA-K) and LOMMA+GMI (LOMMA-G) with the varying in different public datasets  $\mathcal{D}_{pub}$  (CelebA and FFHQ), and pre-trained datasets  $\mathcal{D}_{pretrain}$  (Imagenet1K and MS-CelebA-1M).

iterations. We observe that after a few iterations, the FI for earlier layers keeps dominant compared to the later layers.

**Different MI losses.** In the main manuscript, we use  $l_2$  distance to compute the MI loss. In addition, we provide FI results using  $l_1$  distance and LPIPS [25] to compute the MI loss. The FI results obtained using different MI loss functions are consistent with our main FI observation in the main manuscript.

These additional FI results are consistent with those in our main FI observation in the main manuscript.

#### B.4. MI Robustness via the False Positive Concept

We provide additional analysis in this Appendix to provide a clear understanding of how our proposed TL-DMI effectively defends against MI attacks, leading to more false positive during MI attacks and decrease in attack accuracy.

As discussed, it has been shown that when a deep neural network-based classifier, denoted as  $T = C \circ E$ , is

pre-trained on a large-scale dataset  $\mathcal{D}_{pretrain}$ , the features learned in the earlier layers  $E$  are transferable to another somewhat related classifier on datasets  $\mathcal{D}_{priv}$ , enabling the model to maintain its natural accuracy without explicitly updating its parameters on  $\mathcal{D}_{priv}$  in the earlier layers [23]. This transferability of features benefits our proposed TL-DMI through maintaining the model classification performance and natural accuracy.

In contrast, MI attacks require accurate features to reconstruct the private training dataset  $\mathcal{D}_{priv}$ . By refraining from updating  $E$  on  $\mathcal{D}_{priv}$ , we limit the leakage of private features into  $E$ , thereby improving MI robustness. Specifically, recall MI attacks are usually formulated as:

$$w^* = \arg \min_w (-\log P_T(y|G(w)) + \lambda \mathcal{L}_{prior}(w)) \quad (1)$$

Therefore, MI attacks aim to seek  $w$  with high likelihood  $P_T(y|G(w))$ . We make this key observation to un-

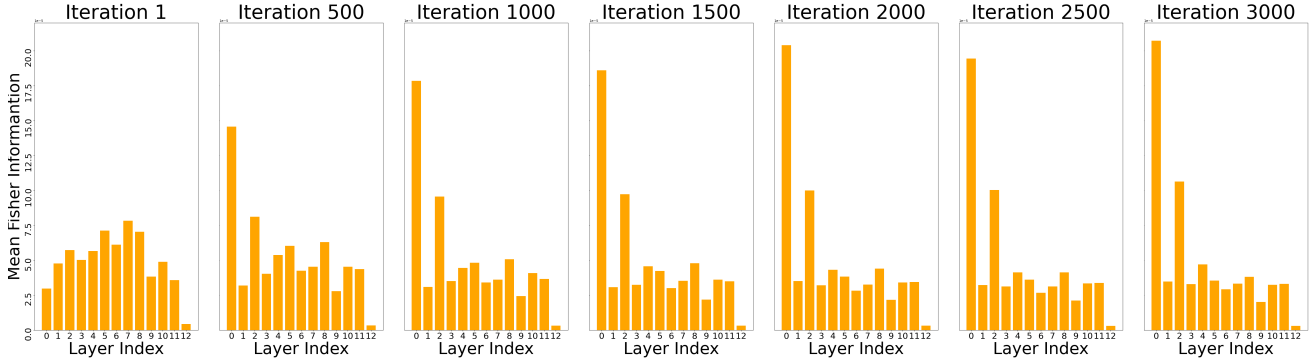

Figure 4. FI distributions across layers during all MI steps. We conduct FI analysis on the main setup in Peng et al [15] where the MI attack is KEDMI [3],  $T=VGG16$ ,  $\mathcal{D}_{priv}=\text{CelebA}$  and  $\mathcal{D}_{pub}=\text{CelebA}$ . In the main manuscript, we present the FI analysis at the last MI iteration, i.e., iteration 3000. This figures present a more comprehensive FI analysis across multiple iterations. After first few iterations, we consistently observe that the earlier layers are more important to MI task.

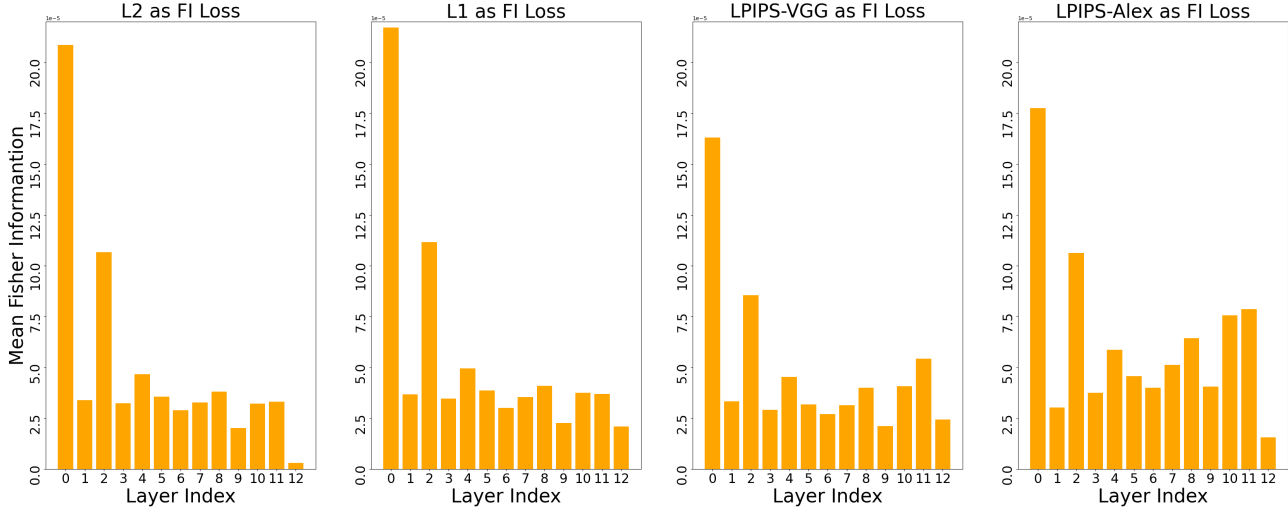

Figure 5. FI distributions across layers via different FI losses. We conduct FI analysis on the main setup in Peng et al [15] where the MI attack is KEDMI [3],  $T=VGG16$ ,  $\mathcal{D}_{priv}=\text{CelebA}$  and  $\mathcal{D}_{pub}=\text{CelebA}$ . In the main manuscript, we use  $l_2$  distance between reconstructed images and private images as MI loss for the FI analysis. This figure presents the FI analysis through other distances including  $l_1$ , LPIPS-VGG [25], LPIPS-ALEX [25]. The results show the consistent observation that the earlier layers of a network are more important to MI attacks compared with later layers.

derstand how our proposed TL-DMI can degrade MI task: *With TL-DMI, while latent variables with high likelihood  $P_T(y|G(w))$  can still be identified via Eq. 1, many  $w^*$  are false positives, i.e.  $G(w^*)$  do not resemble private samples. This results in decrease in attack accuracy.* This can be observed from the likelihood distributions  $P_{T|\theta_C|=16.8M}$  and  $P_{T|\theta_C|=13.9M}$  for both KEDMI (see Fig. 6) and GMI (see Fig. 7), which are similar and close to 1. These findings indicate that with our proposed TL-DMI, Eq. 1 could still perform well to seek latent variables  $w$  to maximize the

likelihood  $P_T(y|G(w))$ . However, although likelihood distributions  $P_{T|\theta_C|=16.8M}$  and  $P_{T|\theta_C|=13.9M}$  are similar under attacks, the attack accuracy of model with  $|\theta_C| = 13.9M$  is significantly lower than that with  $|\theta_C| = 16.8M$ . This suggests that, due to lack of private data information in  $E$  in our proposed TL-DMI model  $|\theta_C| = 13.9M$ , many  $w^*$  do not correspond to images resembling private images.

In the setup where  $|\theta_C| = 16.8M$ , the optimization process causes the latent variables  $w$  to converge towards regions that are closer to the private samples. This outcome is

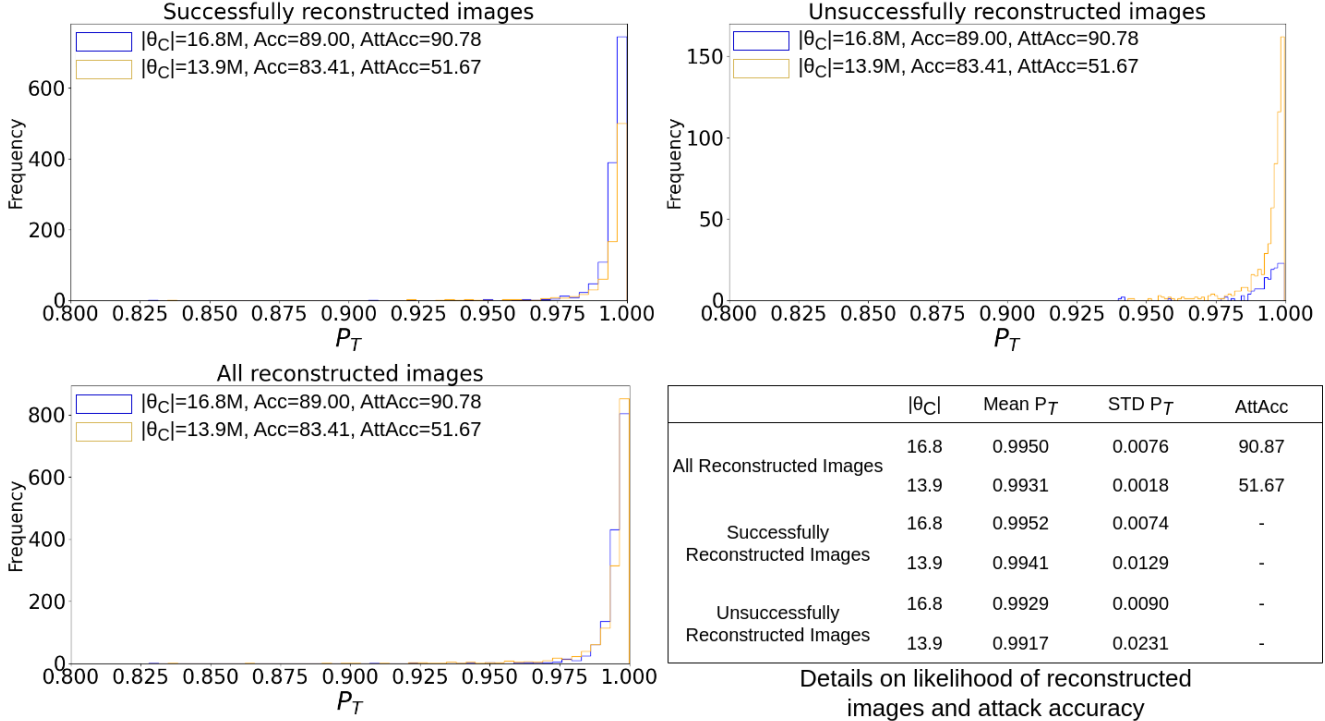

Figure 6. Visualization of the distribution of  $P_T$  for two models: the **no defense model** (with  $|\theta_C| = 16.8M$ ) and **TL-DMI proposed approach** (with  $|\theta_C| = 13.9M$ ). The visualization is conducted using KEDMI as the attack method, with  $\mathcal{D}_{priv} = \text{CelebA}$ ,  $\mathcal{D}_{pub} = \text{CelebA}$ ,  $\mathcal{D}_{pretrain} = \text{Imagenet1K}$ , and  $T = \text{VGG16}$ . We observe that both our proposed TL-DMI model and the model without defense exhibit similar distributions of  $P_T$ . The values of  $P_T$  for both successfully and unsuccessfully reconstructed images are very close to 1 in both cases. However, the attack accuracy shows a significant drop from 90.87 to 51.67 when our proposed TL-DMI is applied.

expected since the model possesses richer low-level features from the private dataset  $\mathcal{D}_{priv}$  in both  $E$  and  $C$ . Consequently, we observe more true positives after MI optimization, where the likelihood  $P_T(y|G(w))$  is well maximized, and the evaluation model successfully classifies them as label  $y$ .

In contrast, in the setup where  $|\theta_C| = 13.9M$ , the lack of low-level features from  $\mathcal{D}_{priv}$  in  $E$  hinders the optimization process. As a result, we observe a higher number of false positives after MI optimization. Although these instances successfully maximize the likelihood  $P_T(y|G(w))$ , the evaluation model is unable to classify them as label  $y$  correctly. Therefore, this behavior indicates a higher level of robustness against the MI attack.

### C. The limitation of Existing MI Defenses

**Conflicting objectives between classification and MI defense regularizers:** One limitation of the existing MI defenses [15, 22] is the introduction of additional regularizers that conflict with the primary objective of minimizing the classification loss [15]. This conflict often leads to a significant decrease in the overall model utility.

**BiDO is sensitive to hyper-parameters.** BiDO [15],

while attempting to partially recover model utility, suffers from sensitivity to hyper-parameters. Optimizing three objectives simultaneously is a complex task, requiring careful selection of weights to balance the three objective terms. The Tab. 10 results in an explicit accuracy drop when adjusting hyper-parameters  $\lambda_x$  and  $\lambda_y$  even with a small change. The optimized values for  $\lambda_x$  and  $\lambda_y$  in BiDO are obtained through a grid search [15]. For example, in the case of BiDO-HSIC, the authors tested values of  $\lambda_x \in [0.01, 0.2]$  and  $\frac{\lambda_y}{\lambda_x} \in [5, 50]$ . Furthermore, BiDO requires an additional parameter,  $\sigma$ , for applying Gaussian kernels to inputs  $x$  and latent representations  $z$  in order to utilize COCO [7] and HSIC [6] as dependency measurements.

### D. Experiment Setting

#### D.1. Detailed MI Setup

**Attack Dataset.** Following existing MI works [3, 14, 21, 26], our work focuses on the study of CelebA [12]. Furthermore we demonstrate the efficacy of our proposed TL-DMI on other facial datasets with more attack classes (Facescrub [13]) or larger scale (VGGFace2 [2]) and on the an-

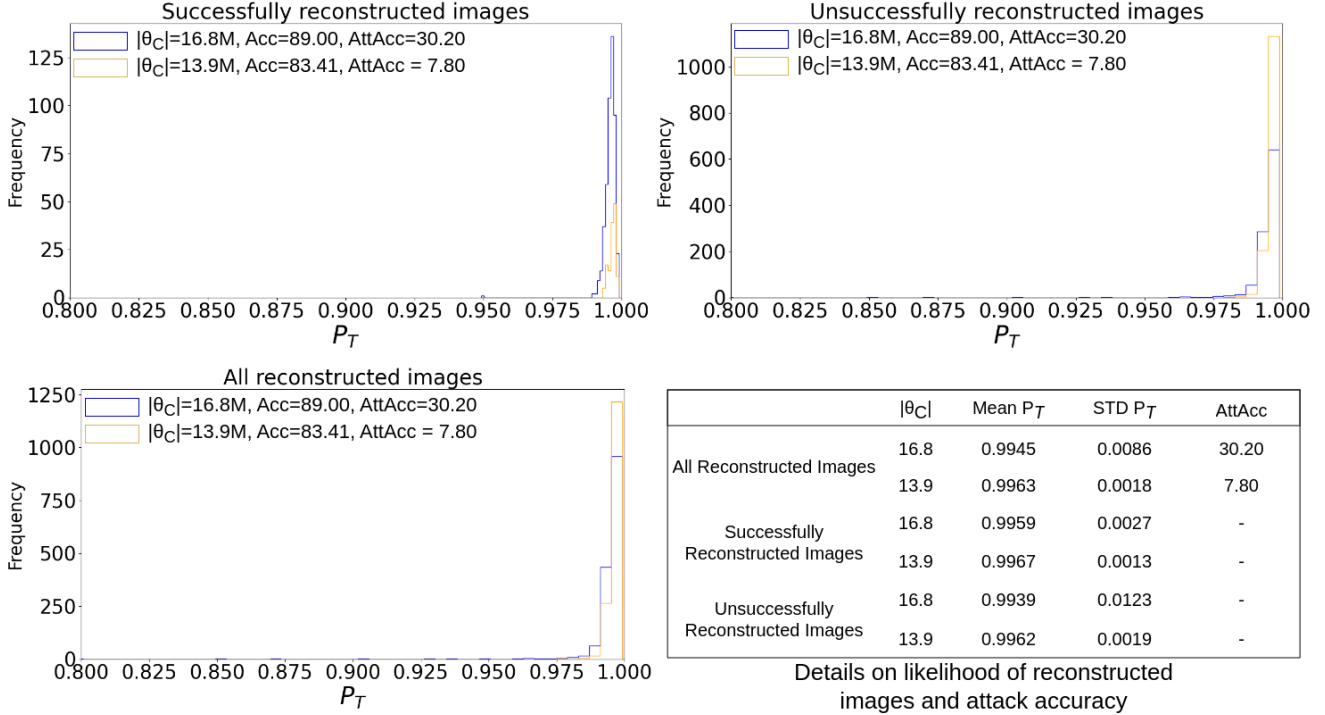

Figure 7. Visualization of the distribution of  $P_T$  for two models: the **no defense model** (with  $|\theta_C| = 16.8M$ ) and **TL-DMI proposed approach** (with  $|\theta_C| = 13.9M$ ). The visualization is conducted using GMI as the attack method, with  $\mathcal{D}_{priv} = \text{CelebA}$ ,  $\mathcal{D}_{pub} = \text{CelebA}$ ,  $\mathcal{D}_{pretrain} = \text{Imagenet1K}$ , and  $T = \text{VGG16}$ . We observe that both our proposed TL-DMI model and the model without defense exhibit similar distributions of  $P_T$ . The values of  $P_T$  for both successfully and unsuccessfully reconstructed images are very close to 1 in both cases. However, the attack accuracy shows a significant drop from 90.87% to 51.67% when our proposed TL-DMI is applied.

| Architecture | MI Attack | First run              |                         | Second run             |                         | Third run              |                         | Average                |                         |
|--------------|-----------|------------------------|-------------------------|------------------------|-------------------------|------------------------|-------------------------|------------------------|-------------------------|
|              |           | Natural Acc $\uparrow$ | Attack Acc $\downarrow$ |
| VGG16        | KEDMI     |                        | 51.67 $\pm$ 3.93        |                        | 49.67 $\pm$ 4.86        |                        | 53.60 $\pm$ 4.06        |                        | 51.65 $\pm$ 4.28        |
|              | GMI       | 83.41                  | 7.80 $\pm$ 3.36         | 83.11                  | 8.80 $\pm$ 2.28         | 83.54                  | 8.80 $\pm$ 3.36         | 83.35                  | 8.47 $\pm$ 3.00         |
| Resnet-34    | VMI       | 62.2                   | 23.70 $\pm$ 21.38       | 62.88                  | 19.55 $\pm$ 12.90       | 63.12                  | 21.95 $\pm$ 12.36       | 62.73                  | 21.73 $\pm$ 15.91       |
| IR152        | KEDMI     |                        | 64.60 $\pm$ 4.93        |                        | 71.6 $\pm$ 4.85         |                        | 69.33 $\pm$ 5.03        |                        | 68.51 $\pm$ 4.94        |
|              | GMI       | 86.7                   | 8.93 $\pm$ 3.73         | 86.47                  | 9.47 $\pm$ 2.57         | 86.37                  | 9.60 $\pm$ 4.16         | 86.51                  | 9.33 $\pm$ 3.49         |
| FaceNet64    | KEDMI     |                        | 73.40 $\pm$ 4.10        |                        | 76.27 $\pm$ 4.09        |                        | 76.20 $\pm$ 3.96        |                        | 75.29 $\pm$ 4.05        |
|              | GMI       | 83.61                  | 15.73 $\pm$ 4.58        | 83.01                  | 15.93 $\pm$ 5.20        | 82.71                  | 13.6 $\pm$ 3.97         | 83.11                  | 15.09 $\pm$ 4.58        |

Table 7. We present the results for running experiments multiples time to show the reproducibility of our proposed TL-DMI. For KEDMI [3]/GMI [26], we conduct the attacks with  $\mathcal{D}_{priv} = \text{CelebA}$ ,  $\mathcal{D}_{pub} = \text{CelebA}$ ,  $\mathcal{D}_{pretrain} = \text{Imagenet1K}$ , and  $T = \text{VGG16/IR152/FaceNet64}$ . For VMI [21], we conduct the attacks with  $\mathcal{D}_{priv} = \text{CelebA}$ ,  $\mathcal{D}_{pub} = \text{CelebA}$ ,  $T = \text{Resnet-34}$ , and there is no  $\mathcal{D}_{pretrain}$  for this setup.

imal dataset Stanford Dogs [11]. The details for these datasets used in the experimental setups can be found in Tab. 9.

**Attack Data Preparation Protocol.** Following previous works [1, 3, 14, 19, 21, 26] approaches, we split the dataset into private  $\mathcal{D}_{priv}$  and public  $\mathcal{D}_{pub}$  subsets with no class intersection.  $\mathcal{D}_{priv}$  is used to train the target classifier  $T$ , while  $\mathcal{D}_{pub}$  is used to extract general features only.

**Target Classifier  $T$ .** We select VGG16 for  $T$  for a fair comparison with SOTA MI defense [15]. As our proposed

TL-DMI is architecture-agnostic, we also extend the defense results on more common and recent architectures: i.e., IR152 [9], FaceNet64 [4], Resnet-34, Resnet-18, Resnet-50 [9], ResNeSt-101 [24], and MaxViT [20], which are not explored in previous MI defense setups [15, 22].

**Pre-trained Dataset for Target Classifier  $\mathcal{D}_{pretrain}$ .** We use Imagenet-1K [5] for VGG16, Resnet-18/50, ResNeSt-101, and MaxViT, and MS-CelebA-1M [8] for IR152 and FaceNe64, following previous works [3, 26]. For Resnet-34, since it is trained from scratch in the orig-

| Architecture | Dataset       | Input Resolution | #Epoch | Batch size | Learning rate | Optimizer | Weight Decay | Momentum |
|--------------|---------------|------------------|--------|------------|---------------|-----------|--------------|----------|
| VGG16        | CelebA        | 64x64            | 200    | 64         | 0.02          | SGD       | 0.0001       | 0.9      |
| IR152        | CelebA        | 64x64            | 100    | 64         | 0.01          | SGD       | 0.0001       | 0.9      |
| FaceNet64    | CelebA        | 64x64            | 200    | 8          | 0.008         | SGD       | 0.0001       | 0.9      |
| Resnet-34    | CelebA        | 64x64            | 200    | 64         | 0.1           | SGD       | 0.0005       | 0.9      |
| Resnet-18    | CelebA        | 224x224          | 100    | 128        | 0.001         | Adam      | -            | -        |
| MaxViT       | CelebA        | 224x224          | 100    | 64         | 0.001         | Adam      | -            | -        |
| ResNeSt-101  | Stanford Dogs | 224x224          | 100    | 128        | 0.001         | Adam      | -            | -        |
| Resnet-50    | VGGFace2      | 224x224          | 100    | 1024       | 0.001         | Adam      | -            | -        |

Table 8. Training settings for target classifier  $T$ . We follow the procedure for training  $T$  from previous works [3, 14, 19]

|               | #Classes | #Images | #Attack Classes |
|---------------|----------|---------|-----------------|
| CelebA        | 1,000    | 27,018  | 300             |
| Facescrub     | 530      | 106,863 | 530             |
| VGGFace2      | 8,631    | 3.31M   | 100             |
| Stanford Dogs | 120      | 20,580  | 120             |

Table 9. MI Private Dataset Setting. We follow previous works [1, 3, 14, 19, 21, 26] for the datasets selection.

|                    | $\lambda_x$ | 0.05  | 0.05  | 0.05  | 0.06  | 1.0   | 1.0   | 1.0 |
|--------------------|-------------|-------|-------|-------|-------|-------|-------|-----|
| $\lambda_y$        | 0.5         | 0.4   | 0.6   | 0.5   | 0.5   | 5.0   | 10.0  |     |
| <b>Natural Acc</b> | 80.35       | 73.69 | 76.46 | 76.13 | 23.27 | 57.57 | 57.04 |     |

Table 10. The SOTA MI defense, BiDO is sensitive to hyper-parameters, posing challenges for applying effectively to different architectures of target classifier  $T$  or private dataset  $D_{priv}$ . BiDO simultaneously optimizes two objectives:  $d(x, f)$  (limiting information of input  $x$  and feature representations  $f$ ) and  $d(f, y)$  (providing sufficient information about label  $y$  to  $f$ ), in addition to the main objectives  $\mathcal{L}$ . Therefore, the final objective is  $\mathcal{L} + \lambda_x d(x, z) + \lambda_y d(f, y)$ , where careful weight selection for  $\lambda_x$  and  $\lambda_y$  is necessary to achieve a balanced training among three objectives. It is clear that inappropriate values of  $\lambda_x$  and  $\lambda_y$  in BiDO cause an unstable training  $T$ . Note that [15] requires an extensive grid search to determine suitable values for  $\lambda_x$  and  $\lambda_y$ .

inal VMI setup [21], we freeze the layers initialized from scratch. In Sec. B, we also study two additional pre-trained datasets, Facescrub [13] and Pubfig83 [16].

**MI Attack Method.** Our work focuses on white-box attacks, the most effective method in the literature. Following the SOTA MI defense [15], we evaluate our proposed TLDMI against three well-known attacks: GMI [26], KEDMI [3], and VMI [21]. We further evaluate our proposed TLDMI against current SOTA MI attacks as well as other SOTA MI attacks LOMMA [14], PPA [19], and MIRROR [1]. The details for MI attack setups can be found below and in the Tab. 11:

- **GMI** [26] uses a pre-trained GAN to understand the im-

age structure of an additional dataset. It then identifies inversion images by analyzing the latent vector of the generator.

- **KEDMI** [3] expands on GMI [26] by training a discriminator to differentiate between real and fake samples and predict the label as the target model. The authors also propose modeling the latent distribution to reduce inversion time and enhance the quality of reconstructed samples.
- **VMI** [21] introduces a probabilistic interpretation of MI and presents a variational objective to approximate the latent space of the target data.
- **LOMMA** [14] introduces two concepts of logit loss for identity loss and model augmentation to improve attack accuracy of previous MI attacks including GMI, KEDMI, and VMI.
- **PPA** [19] proposes a framework for MI attack for high resolution images, which enable the use of a single GAN (i.e., StyleGAN) to attack a wide range of targets, requiring only minor adjustments to the attack.
- **MIRROR** [1] proposes a MI attack framework based on StyleGAN similar to PPA, which aims at reconstructing private images having high fidelity.
- **BREPMI** [10] introduce a new MI attack that can reconstruct private training data using only the predicted labels of the target model. The attack works by evaluating the predicted labels over a sphere and then estimating the direction to reach the centroid of the target class.

## D.2. Evaluation metrics

In the main manuscript, we make use of Natural Accuracy, Attack Accuracy, and K-Nearest-Neighbors Distance (KNN Dist) metrics to evaluate MI robustness. These metrics are described as:

- **Attack accuracy (AttAcc).** To gauge the effectiveness of an attack, we develop an *evaluation classifier* that predicts the identities of the reconstructed images. This metric assesses the similarity between the gener-



|               | #Iteration | $w$ clipping | Learning rate | #Attack per class |
|---------------|------------|--------------|---------------|-------------------|
| <b>GMI</b>    | 3000       | Yes          | 0.02          | 5                 |
| <b>KEDMI</b>  | 3000       | Yes          | 0.02          | 5                 |
| <b>VMI</b>    | 320        | -            | 0.0001        | 100               |
| <b>LOMMA</b>  | 2400       | Yes          | 0.02          | 5                 |
| <b>PPA</b>    | 50         | Yes          | 0.005         | 50                |
| <b>MIRROR</b> | 500        | Yes          | 0.25          | 8                 |

Table 11. MI Attack Setups. We follow the MI setups from previous works [1, 3, 14, 15, 19]

| Architecture | Method             | $\lambda_{MID}$ | $\lambda_x$ | $\lambda_y$ | $ \theta_C $ | Natural Acc $\uparrow$ |
|--------------|--------------------|-----------------|-------------|-------------|--------------|------------------------|
| VGG16        | No. Def            | -               | -           | -           | 16.8         | 89.00                  |
|              | MID                | 0.01            | -           | -           | -            | 68.39                  |
|              | MID                | 0.003           | -           | -           | -            | 78.70                  |
|              | BiDO-COCO          | -               | 10          | 50          | -            | 74.53                  |
|              | BiDO-COCO          | -               | 5           | 50          | -            | 81.55                  |
|              | BiDO-HSIC          | -               | 0.05        | 1           | -            | 70.31                  |
|              | BiDO-HSIC          | -               | 0.05        | 0.5         | -            | 80.35                  |
|              | TL-DMI             | -               | -           | -           | 15.0         | 86.57                  |
|              | TL-DMI             | -               | -           | -           | 13.9         | 83.41                  |
|              | TL-DMI             | -               | -           | -           | 11.5         | 77.89                  |
|              | TL-DMI             | -               | -           | -           | 9.1          | 69.80                  |
|              | TL-DMI + BiDO-HSIC | -               | 0.05        | 0.4         | 15.0         | 84.31                  |
|              | TL-DMI + BiDO-HSIC | -               | 0.03        | 0.4         | 15.0         | 82.15                  |
| Resnet-34    | No. Def            | -               | -           | -           | 21.5         | 69.27                  |
|              | MID                | 0               | -           | -           | -            | 52.52                  |
|              | BiDO-COCO          | -               | 0.05        | 2.5         | -            | 59.34                  |
|              | BiDO-HSIC          | -               | 0.1         | 2           | -            | 61.14                  |
|              | TL-DMI             | -               | -           | -           | 21.1         | 62.20                  |
| IR152        | No. Def            | -               | -           | -           | 62.6         | 93.52                  |
|              | TL-DMI             | -               | -           | -           | 17.8         | 86.70                  |
| FaceNet64    | No. Def            | -               | -           | -           | 35.4         | 88.50                  |
|              | TL-DMI             | -               | -           | -           | 34.4         | 83.61                  |
| Resnet-18    | No. Def            | -               | -           | -           | 11.7         | 95.30                  |
|              | TL-DMI             | -               | -           | -           | 8.9          | 91.17                  |
| MaxViT       | No. Def            | -               | -           | -           | 30.9         | 96.57                  |
|              | TL-DMI             | -               | -           | -           | 18.3         | 93.00                  |
| ResNeSt-101  | No. Def            | -               | -           | -           | 48.4         | 75.07                  |
|              | TL-DMI             | -               | -           | -           | 27.9         | 79.64                  |

Table 12. Hyperparameters setting for training target classifiers. We follow previous work [15] for the hyperparameters selection of MID and BiDO.

ated samples and the target class. If the evaluation classifier attains high accuracy, the attack is considered successful. To ensure an unbiased and informative evaluation, the evaluation classifier should exhibit maximal accuracy.

- **Natural accuracy (Acc).** In addition to assessing the Attack Acc of a released model, it is also necessary to ensure that the model performs satisfactorily in terms of its classification utility. The evaluation of the model’s classification utility is typically measured by its natural accuracy, which refers to the accuracy of the model in the classification problem.
- **K-Nearest Neighbors Distance (KNN Dist).** The KNN Dist metric provides information about the proximity

| Architecture | Method                    | Total Training Time (Seconds) $\downarrow$ | Ratio $\downarrow$ | Natural Acc $\uparrow$ |
|--------------|---------------------------|--------------------------------------------|--------------------|------------------------|
| VGG16        | No. Def                   | 2122                                       | 1.00               | 89.00                  |
|              | BiDO-COCO                 | 3288                                       | 1.55               | 81.55                  |
|              | BiDO-HSIC                 | 3296                                       | 1.55               | 80.35                  |
|              | <b>TL-DMI</b>             | <b>1460</b>                                | <b>0.69</b>        | <b>83.41</b>           |
|              | <b>TL-DMI + BiDO-HSIC</b> | <b>2032</b>                                | <b>0.96</b>        | <b>84.14</b>           |
| IR152        | No. Def                   | 6019                                       | 1.00               | 93.52                  |
|              | <b>TL-DMI</b>             | <b>2808</b>                                | <b>0.47</b>        | <b>86.70</b>           |
| FaceNet64    | No. Def                   | 16344                                      | 1.00               | 88.50                  |
|              | <b>TL-DMI</b>             | <b>14448</b>                               | <b>0.88</b>        | <b>83.61</b>           |

Table 13. Computational Resource. We remark that our proposed TL-DMI achieve SOTA MI robustness while reduce the computational cost as we keep the same training protocol and update fewer parameters than No. Def and SOTA MI Defense BiDO.

between a reconstructed image associated with a particular label or ID, and the images that exist in the private training dataset. This metric is calculated by determining the shortest feature distance between the reconstructed image and the actual images in the private dataset that correspond to the given class or ID. To calculate the KNN Dist, an  $l_2$  distance measure is used between the two images in the feature space, specifically in the penultimate layer of the evaluation model. This distance measure provides insight into the similarity between the reconstructed and the real images in the training dataset for a particular label or ID.

- **$\delta_{EvalNet}$  and  $\delta_{FaceNet}$**  These metrics are measured by the squared  $l_2$  distance between the activation in the penultimate layers.  $\delta_{EvalNet}$  is computed via Evaluation Model while  $\delta_{FaceNet}$  is computed via pre-trained FaceNet [17]. A lower value indicates that the attack results are more visually similar to the training data.
- **$l_2$  distance.**  $l_2$  distance measures how similar the inverted images are to the private data by computing the distance between reconstructed features the centroid features of the private data. A lower distance means that the inverted images are more similar to the target class.
- **Frechet inception distance (FID).** FID is commonly used to evaluate generative model to access the generated images. The FID measures the similarity between two sets of images by computing the distance between their feature vectors. Feature vectors are extracted using an Inception-v3 model that has been trained on the ImageNet dataset. In the context of MI, a lower FID score indicates that the reconstructed images are more similar to the private training images.

## E. Reproducibility

### E.1. The details for training $T$

**Training target classifier  $T$ .** In this work, we employ VGG16 [18], IR152 [9], and FaceNet64 [4] for our investi-

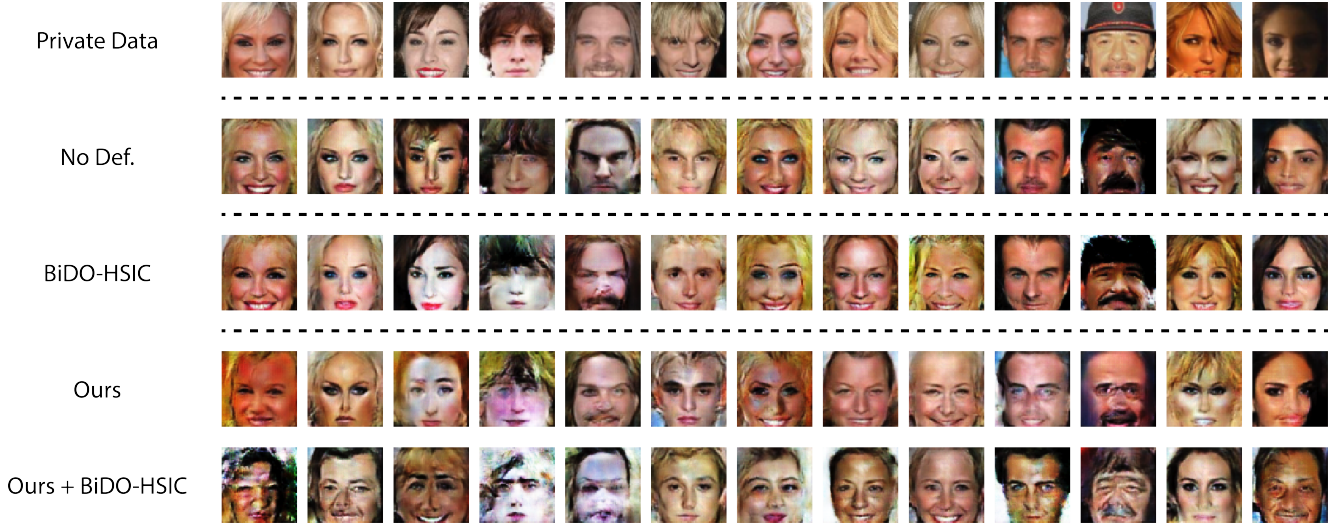

Figure 8. Qualitative results to showcase the effectiveness of our proposed TL-DMI, using KEDMI [3] with  $\mathcal{D}_{priv} = \text{CelebA}$ ,  $\mathcal{D}_{pub} = \text{CelebA}$ ,  $\mathcal{D}_{pretrain} = \text{Imagenet1K}$ , and  $T = \text{VGG16}$ . The visual comparison reveals that our proposed TL-DMI achieves competitive reconstruction of private data, while the hybrid approach combining our method with BiDO-HSIC demonstrates a significant degradation in MI attack and reconstruction quality.

gation. All target classifiers are trained on CelebA dataset. For GMI [26] and KEDMI [3], the target classifiers trained were VGG16, IR152, and FaceNet64, while Resnet-34 was used as the target classifier for VMI [21]. As mentioned in the main manuscript, we employ Imagenet-1K as the pre-trained dataset for VGG16, while MS-CelebA-1M was used as the pre-trained dataset for IR152 and FaceNet64. The details of the training procedure are shown in Tab. 8 below.

**Important Hyper-parameters.** In our work, we performed an analysis of our proposed TL-DMI against existing SOTA model inversion defense methods: MID [22] and Bilateral Dependency Optimization (BiDO)[15]. MID [22] adds a regularizer  $d(x, T(x))$  to the main objective during the target classifier’s training to penalize the mutual information between inputs  $x$  and outputs  $T(x)$ . BiDO [15] attempts to minimize  $d(x, z)$  to reduce the amount of information about inputs  $x$  embedded in feature representations  $z$ , while maximizing  $d(z, y)$  to provide  $z$  with enough information about  $y$  to restore the natural accuracy. For simplicity, we use  $\lambda_{MID}$ ,  $\lambda_x$ , and  $\lambda_y$  to represent  $d(x, T(x))$ ,  $d(x, z)$ , and  $d(z, y)$  respectively. The settings of these hyper-parameters are detailed in Tab. 12.

## E.2. Compute resource

All our experiments are run on NVIDIA RTX A5000 GPUs. Given that our work is focused on model inversion defense, we provide the total training time (seconds) for the target classifier and the ratio of training time between each model inversion defense method against the No. Def. The results in Tab. 13 below show that **our proposed TL-DMI can greatly reduce the amount of time required to train the**

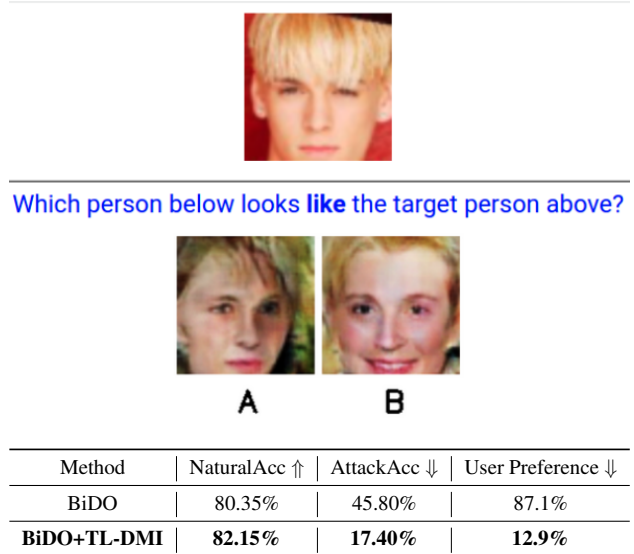

Figure 9. An example for the user study inference (top) and the results for user study (bottom). Compared to BiDO, our proposed TL-DMI provide a better defense with higher natural accuracy but lower user preference.

**target classifier.**

## E.3. Error Bars

For this section, we ran a total of 7 setups (3 times for each setup) across 4 different architectures of the target classifiers, and report their respective natural accuracy and attack accuracy values. For each experiment, we use the same MI

attack setup and training settings for target classifiers as reported in the main setups comparing with BiDO and Tab. 8 respectively. We show that the results obtained are reproducible and do not deviate much from the reported values in the main paper. These results can be found in Tab. 7 below.

## F. Qualitative results

### F.1. Visual Comparison

We evaluate the efficacy of our proposed TL-DMI along with BiDO for preventing privacy leakage on CelebA and also provide visualisation of the samples produced using the KEDMI [3] MI attack method. In Fig. 8 below, each column represents the same identity and the first row represents the ground-truth private data while each subsequent row shows the attack samples reconstructed for each MI defense method.

### F.2. User study

We conduct our user study via Amazon MTurk with the interface as shown above. We adapt our user study from MIRROR. In the setup, participants are presented with a real image of the target class, and then asked to pick one of two inverted images that is more closely aligned with the real image. The order is randomized, with each image pair displayed on-screen for a maximum duration of 60 seconds. The assessment encompassed all 300 targeted classes. Each pair of inverted images is assigned to 10 unique individuals, thus our user study involves a total of 3000 pairs of inverted images. We use KEDMI as the MI attack with  $\mathcal{D}_{priv} = CelebA$ ,  $\mathcal{D}_{pub} = CelebA$ ,  $T = FaceNet$ . Consistent with the AttackAcc, the user study shows that our proposed TL-DMI provides better defense against the reconstruction of private data characteristics compared to BiDO.

## References

- [1] Shengwei An, Guanhong Tao, Qiuling Xu, Yingqi Liu, Guangyu Shen, Yuan Yao, Jingwei Xu, and Xiangyu Zhang. Mirror: Model inversion for deep learning network with high fidelity. In *Proceedings of the 29th Network and Distributed System Security Symposium*, 2022. 7, 8, 9
- [2] Qiong Cao, Li Shen, Weidi Xie, Omkar M Parkhi, and Andrew Zisserman. Vggface2: A dataset for recognising faces across pose and age. In *2018 13th IEEE international conference on automatic face & gesture recognition (FG 2018)*, pages 67–74. IEEE, 2018. 6
- [3] Si Chen, Mostafa Kahla, Ruoxi Jia, and Guo-Jun Qi. Knowledge-enriched distributional model inversion attacks. In *Proceedings of the IEEE/CVF international conference on computer vision*, pages 16178–16187, 2021. 5, 6, 7, 8, 9, 10, 11
- [4] Yu Cheng, Jian Zhao, Zhecan Wang, Yan Xu, Karlekar Jayashree, Shengmei Shen, and Jiashi Feng. Know you at one glance: A compact vector representation for low-shot learning. In *Proceedings of the IEEE International Conference on Computer Vision Workshops*, pages 1924–1932, 2017. 7, 9
- [5] Jia Deng, Wei Dong, Richard Socher, Li-Jia Li, Kai Li, and Li Fei-Fei. Imagenet: A large-scale hierarchical image database. In *2009 IEEE conference on computer vision and pattern recognition*, pages 248–255. Ieee, 2009. 7
- [6] Arthur Gretton, Olivier Bousquet, Alex Smola, and Bernhard Schölkopf. Measuring statistical dependence with hilbert-schmidt norms. In *Algorithmic Learning Theory: 16th International Conference, ALT 2005, Singapore, October 8-11, 2005. Proceedings 16*, pages 63–77. Springer, 2005. 6
- [7] Arthur Gretton, Ralf Herbrich, Alexander Smola, Olivier Bousquet, Bernhard Schölkopf, et al. Kernel methods for measuring independence. 2005. 6
- [8] Yandong Guo, Lei Zhang, Yuxiao Hu, Xiaodong He, and Jianfeng Gao. Ms-celeb-1m: A dataset and benchmark for large-scale face recognition. In *Computer Vision—ECCV 2016: 14th European Conference, Amsterdam, The Netherlands, October 11-14, 2016, Proceedings, Part III 14*, pages 87–102. Springer, 2016. 7
- [9] Kaiming He, Xiangyu Zhang, Shaoqing Ren, and Jian Sun. Deep residual learning for image recognition. In *Proceedings of the IEEE conference on computer vision and pattern recognition*, pages 770–778, 2016. 7, 9
- [10] Mostafa Kahla, Si Chen, Hoang Anh Just, and Ruoxi Jia. Label-only model inversion attacks via boundary repulsion. In *Proceedings of the IEEE/CVF Conference on Computer Vision and Pattern Recognition*, pages 15045–15053, 2022. 1, 8
- [11] Aditya Khosla, Nityananda Jayadevaprakash, Bangpeng Yao, and Li Fei-Fei. Novel dataset for fine-grained image categorization. In *First Workshop on Fine-Grained Visual Categorization, IEEE Conference on Computer Vision and Pattern Recognition*, Colorado Springs, CO, 2011. 7
- [12] Ziwei Liu, Ping Luo, Xiaogang Wang, and Xiaoou Tang. Deep learning face attributes in the wild. In *Proceedings of the IEEE international conference on computer vision*, pages 3730–3738, 2015. 6
- [13] Hong-Wei Ng and Stefan Winkler. A data-driven approach to cleaning large face datasets. In *2014 IEEE international conference on image processing (ICIP)*, pages 343–347. IEEE, 2014. 6, 8
- [14] Ngoc-Bao Nguyen, Keshigeyan Chandrasegaran, Milad Abdollahzadeh, and Ngai-Man Cheung. Re-thinking model inversion attacks against deep neural networks. In *Proceedings of the IEEE/CVF Conference on Computer Vision and Pattern Recognition (CVPR)*, 2023. 2, 4, 6, 7, 8, 9
- [15] Xiong Peng, Feng Liu, Jingfeng Zhang, Long Lan, Junjie Ye, Tongliang Liu, and Bo Han. Bilateral dependency optimization: Defending against model-inversion attacks. In *KDD*, 2022. 5, 6, 7, 8, 9, 10
- [16] Nicolas Pinto, Zak Stone, Todd Zickler, and David Cox. Scaling up biologically-inspired computer vision: A case

- study in unconstrained face recognition on facebook. In *CVPR 2011 WORKSHOPS*, pages 35–42. IEEE, 2011. 8
- [17] Florian Schroff, Dmitry Kalenichenko, and James Philbin. Facenet: A unified embedding for face recognition and clustering. In *Proceedings of the IEEE conference on computer vision and pattern recognition*, pages 815–823, 2015. 9
- [18] Karen Simonyan and Andrew Zisserman. Very deep convolutional networks for large-scale image recognition. *arXiv preprint arXiv:1409.1556*, 2014. 9
- [19] Lukas Struppek, Dominik Hintersdorf, Antonio De Almeida Correia, Antonia Adler, and Kristian Kersting. Plug & play attacks: Towards robust and flexible model inversion attacks. *arXiv preprint arXiv:2201.12179*, 2022. 7, 8, 9
- [20] Zhengzhong Tu, Hossein Talebi, Han Zhang, Feng Yang, Peyman Milanfar, Alan Bovik, and Yinxiao Li. Maxvit: Multi-axis vision transformer. In *European conference on computer vision*, pages 459–479. Springer, 2022. 7
- [21] Kuan-Chieh Wang, Yan Fu, Ke Li, Ashish Khisti, Richard Zemel, and Alireza Makhzani. Variational model inversion attacks. *Advances in Neural Information Processing Systems*, 34:9706–9719, 2021. 6, 7, 8, 10
- [22] Tianhao Wang, Yuheng Zhang, and Ruoxi Jia. Improving robustness to model inversion attacks via mutual information regularization. In *Proceedings of the AAAI Conference on Artificial Intelligence*, pages 11666–11673, 2021. 6, 7, 10
- [23] Jason Yosinski, Jeff Clune, Yoshua Bengio, and Hod Lipson. How transferable are features in deep neural networks? *Advances in neural information processing systems*, 27, 2014. 4
- [24] Hang Zhang, Chongruo Wu, Zhongyue Zhang, Yi Zhu, Haibin Lin, Zhi Zhang, Yue Sun, Tong He, Jonas Mueller, R Manmatha, et al. Resnest: Split-attention networks. In *Proceedings of the IEEE/CVF conference on computer vision and pattern recognition*, pages 2736–2746, 2022. 7
- [25] Richard Zhang, Phillip Isola, Alexei A Efros, Eli Shechtman, and Oliver Wang. The unreasonable effectiveness of deep features as a perceptual metric. In *Proceedings of the IEEE conference on computer vision and pattern recognition*, pages 586–595, 2018. 4, 5
- [26] Yuheng Zhang, Ruoxi Jia, Hengzhi Pei, Wenxiao Wang, Bo Li, and Dawn Song. The secret revealer: Generative model-inversion attacks against deep neural networks. In *Proceedings of the IEEE/CVF Conference on Computer Vision and Pattern Recognition*, pages 253–261, 2020. 6, 7, 8, 10
